# Supplementary material
Source: MDPI journal article supplement (https://www.mdpi.com/1424-2818/13/10/464)
Supplement: s1 [file s1]

## Electronic Supplementary Material 1

### The third global coral bleaching event on the marginal coral reefs of the southwestern Indian Ocean and factors that contribute to their resistance and resilience

Porter, S.N., Sink, K.J. and Schleyer, M.H.

a)

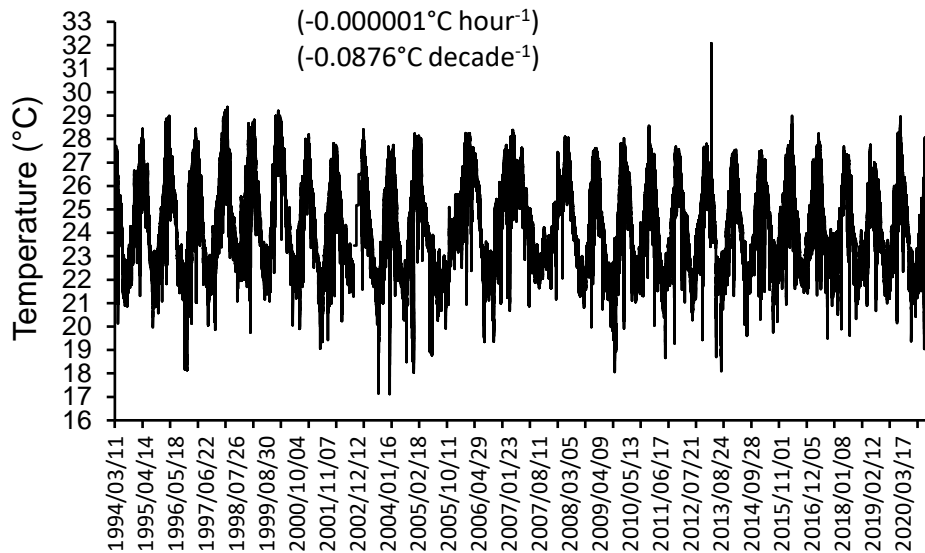

b)

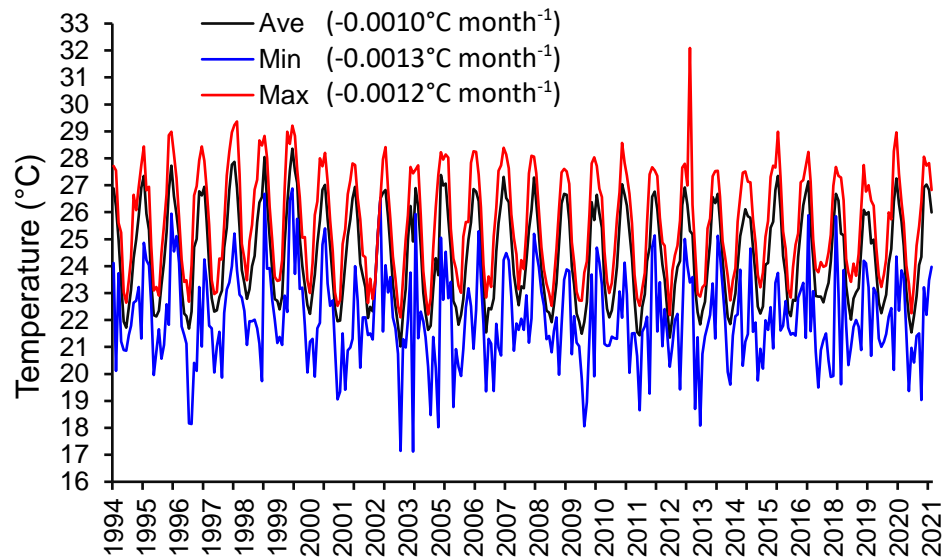

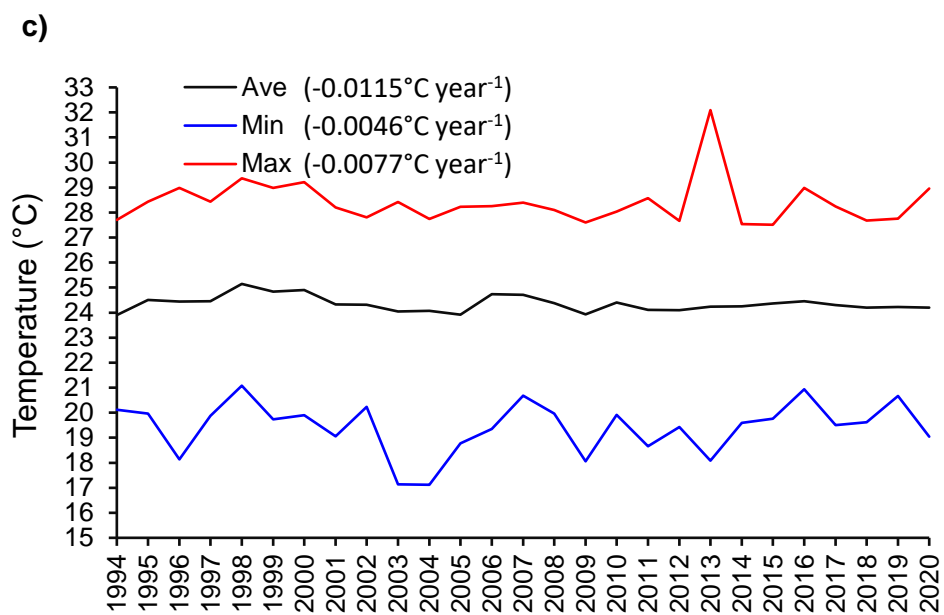

Figure S1. Temperature timeseries for Nine-mile Reef in Maputland for a) hourly, b) monthly and c) yearly metrics. Values in brackets indicate the slopes of the temperature trends derived from linear regression models.
