# Supplementary material
Source: MDPI journal article supplement (https://www.mdpi.com/1424-2818/13/10/464)
Supplement: s1 [file s1]

### Electronic Supplementary Material 3

#### The third global coral bleaching event on the marginal coral reefs of the southwestern Indian Ocean and factors that contribute to their resistance and resilience

Porter, S.N., Sink, K.J. and Schleyer, M.H.

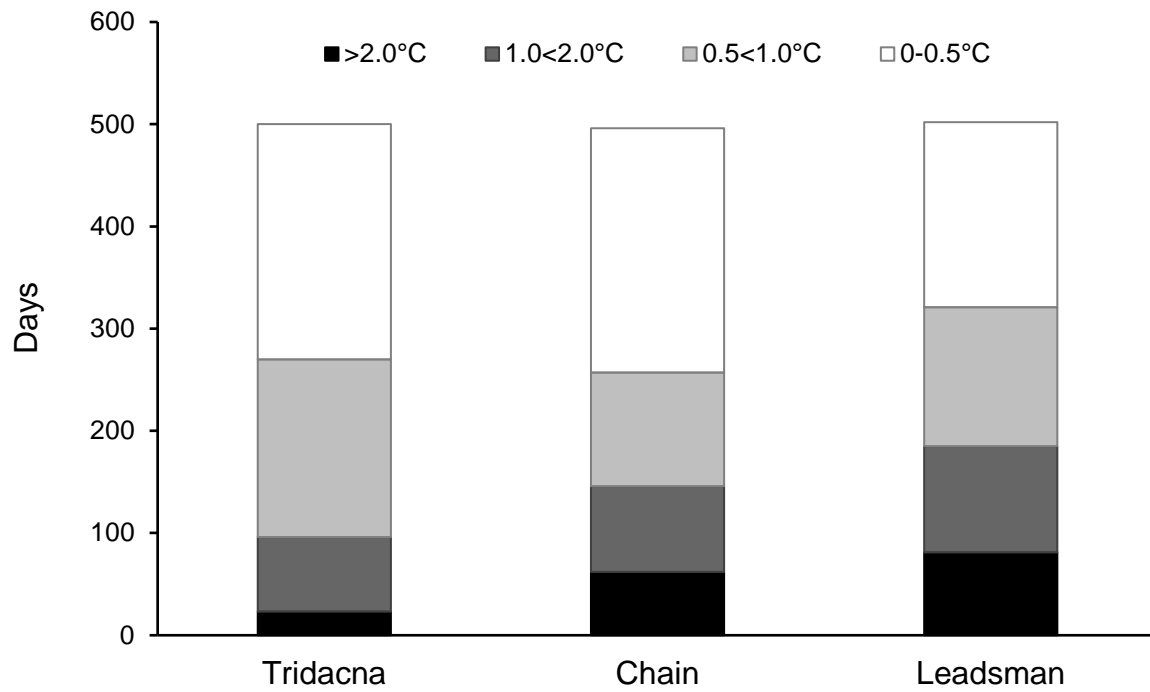

Figure S1. Temperature variation showing overall daily temperature amplitudes (upwelling intensities) measured at Tridacna, Chain and Leadsman, Maputaland, South Africa from December 2014 to April 2016 leading up to peak coral bleaching surveys that were conducted in April-May 2016.
