# Supplementary material
Source: MDPI journal article supplement (https://www.mdpi.com/1424-2818/13/10/464)
Supplement: s1 [file s1]

## Electronic Supplementary Material 2

### The third global coral bleaching event on the marginal coral reefs of the southwestern Indian Ocean and factors that contribute to their resistance and resilience

Porter, S.N., Sink, K.J. and Schleyer, M.H.

a)

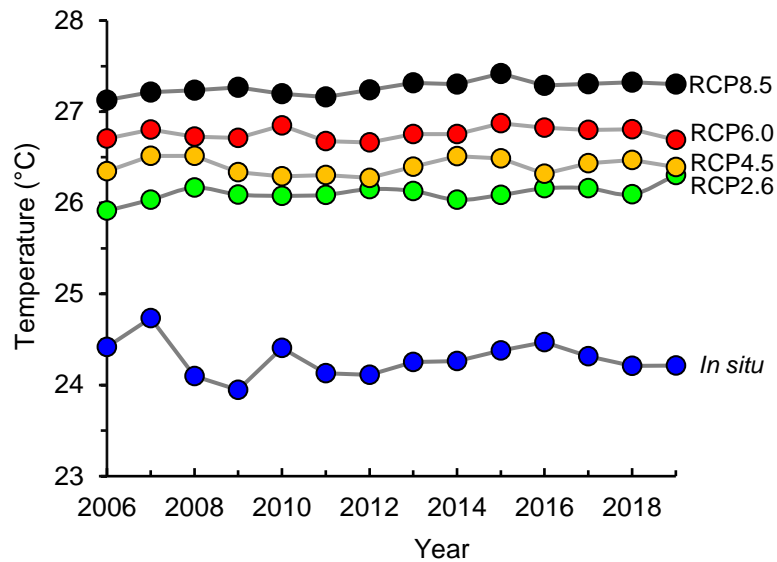

b)

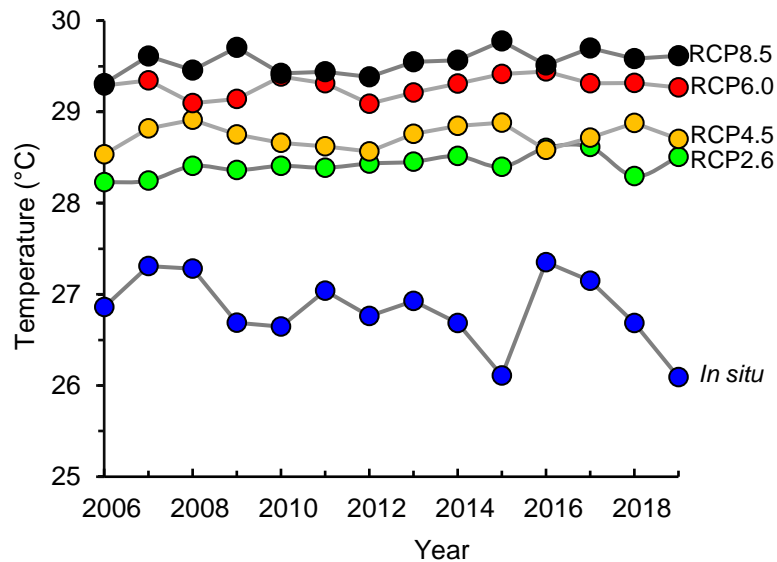

Figure S1. Temperature timeseries from 2006 to 2019 at Nine-mile Reef derived from *in situ* measurements and Representative Concentration Pathway (RCP) models for Nine-mile Reef based on a) yearly average and b) yearly maximum metrics.
